# Supplementary material for: Protein-Based Oncopanel as Addition to Target Sequencing in Head and Neck Squamous Cell Carcinoma to Individualize Treatment Decisions
Source: MDPI journal article supplement (doi:10.3390/ijms232415835), 2022-12-13
Supplement: s1 [file s1]

**Table S1**

| <b>Name</b>      | <b>Host</b> | <b>Clone</b>                    | <b>Dilution</b> | <b>Staining pattern</b>    |
|------------------|-------------|---------------------------------|-----------------|----------------------------|
| ALK              | Ms, m       | ALK1, M7195 (Dako)              | 1:100           | cytoplasmic                |
| AR               | Ms, m       | AR441 (Dako)                    | 1:200           | nucleus                    |
| EGF-R            | Ms, m       | 2.1E1, MSK014-05 (Zytomed)      | 1:100           | membranous                 |
| FLI-1            | Rb, p       | N/A, RB9295 (Medac)             | 1:100           | nuclear                    |
| HER2             | Rb, p       | N/A, A0485 (Dako)               | 1:500           | membranous                 |
| KIT              | Rb, p       | N/A, A4502 (Dako)               | 1:200           | cytoplasmic                |
| MET              | Rb, m       | Met D1C2, 8198 (Cell Signaling) | 1:100           | cytoplasmic/<br>membranous |
| PD-L1            | Rb, m       | E1L3N (Cell Signaling)          | 1:400           | membranous                 |
| PDGF-R           | Rb, m       | D13C6, 5241S (Cell Signaling)   | 1:25            | cytoplasmic                |
| TNF-R8<br>(CD30) | Ms, m       | Ber-H2 (Cell Marque)            | 1:25            | membranous                 |
| VEGF-R           | Ms, p       | N/A, DP067 (Acris)              | 1:200           | cytoplasmic                |

\*Acris, Herford, Germany; Dako, Braunschweig, Germany; Cell Marque, Rocklin, USA; Cell Signaling, Frankfurt, Germany; Medac, Wedel, Germany; Zytomed Systems, Berlin, Germany
