# Supplementary material for: Protein-Based Oncopanel as Addition to Target Sequencing in Head and Neck Squamous Cell Carcinoma to Individualize Treatment Decisions
Source: MDPI journal article supplement (doi:10.3390/ijms232415835), 2022-12-13
Supplement: s1 [file s1]

Supplementary Tables:

**Suppl. Table 1:** Antibody specifications. Ms: mouse; Rb: rabbit; m: monoclonal; p: polyclonal.

**Suppl. Table 2:** Tabular overview of the genomic and proteomic expression of the primary tumors grouped by their recurrence status.

**Suppl. Table 3:** Tabular overview of the sequencing data, the quality of each sample and the amplification and mutation data.
