# Supplementary material for: Protein-Based Oncopanel as Addition to Target Sequencing in Head and Neck Squamous Cell Carcinoma to Individualize Treatment Decisions
Source: Int J Mol Sci. 2022 Dec 13;23(24):15835. doi: 10.3390/ijms232415835 (PMC9779552; doi:10.3390/ijms232415835)
Supplement: Supplementary file 1 [file ijms-23-15835-s001.zip]

Archive with 4 entries (4 files):
- suppl. table 1.pdf
- suppl. table 2.xlsx
- suppl. table 3.xlsx
- Supplement Table Legends.pdf
