# Supplementary material for: Protein-Based Oncopanel as Addition to Target Sequencing in Head and Neck Squamous Cell Carcinoma to Individualize Treatment Decisions
Source: Int J Mol Sci. 2022 Dec 13;23(24):15835. doi: 10.3390/ijms232415835 (PMC9779552; doi:10.3390/ijms232415835)
Supplement: Supplementary file 1 [file ijms-23-15835-s001.zip › suppl. table 2.xlsx]

## Sheet: Sheet1
Table S2
	Oncopanel						Oncomine
	EGFR	MET	VEGFR	FLI1	KIT	PD-L1	amplification	mutation
WITH RECURRENCE	positive	0	0	0	0	0	0	0
	positive	0	0	0	0	0	CCND1	0
	positive	positive	0	0	0	0	0	0
	positive	positive	0	0	0	0	EGFR	0
	positive	positive	0	0	0	0	0	0
	0	0	0	0	0	0	0	0
NO RECURRENCE	positive	0	0	0	0	positive	0	0
	positive	positive	0	0	0	0	CCND1	0
	positive	positive	0	0	0	0	EGFR/CDK6/CCND1	0
	positive	0	0	0	0	positive	0	PIK3CA
	positive	0	0	0	0	positive	0	PIK3CA
	0	0	0	0	0	0	0	0
	positive	0	0	0	0	positive	0	0
	0	0	0	0	0	0	0	0
	0	positive	0	0	0	0	PIK3CA	0
	0	positive	0	0	0	positive	0	0
	positive	0	0	0	0	0	CCND1	0
	positive	positive	0	0	0	positive	0	PIK3CA
	positive	positive	0	0	0	positive	0	0
	positive	0	0	positive	0	0	0	0
	positive	0	0	0	0	positive	0	RAF1
	0	positive	0	0	0	positive	0	0
	positive	0	0	0	0	positive	PIK3CA	0
	positive	positive	0	0	positive	positive	0	NRAS
	positive	0	0	0	0	positive	0	0
	positive	positive	0	0	0	positive	0	0
	positive	positive	0	0	0	positive	0	0
	positive	positive	0	0	0	positive	0	AKT
	positive	0	positive	0	0	positive	0	HRAS
	positive	0	0	0	0	positive	0	0
	positive	0	0	0	0	0	0	0
