# Supplementary material for: Protein-Based Oncopanel as Addition to Target Sequencing in Head and Neck Squamous Cell Carcinoma to Individualize Treatment Decisions
Source: Int J Mol Sci. 2022 Dec 13;23(24):15835. doi: 10.3390/ijms232415835 (PMC9779552; doi:10.3390/ijms232415835)
Supplement: Supplementary file 1 [file ijms-23-15835-s001.zip › suppl. table 3.xlsx]

## Sheet: Tabelle1
Table S3
		Quality control						Amplifications		mutations				cellularity %	classification
Pat. ID	Origin	Total Number of Reads	Mean Coverage	% Bases above 1	% Bases above 20	% Bases above 100	% Bases above 500	Gene	CNV	Gene	cDNA HGVS	protein HGVS	AF %
1	FFPE	5,269,459	18.689	100	100	100	100	CCND1	7.4					20
2	FFPE	4,153,732	14.216	100	100	100	100	EGFR/CDK6/CCND1	8.4/8.5/25.1					10
3	FFPE	1,747,570	6.022	100	100	100	99.9			PIK3CA	c.1624G>A	p.E542K	9	70	pathogenic
4	fresh frozen	1,820,488	6.545	100	100	100	99.87			PIK3CA	c.3140A>G	p.H1047R	19	10-20	pathogenic
5	FFPE	3,702,542	13.119	100	100	100	100							70-80
6	FFPE	5,353,941	18.386	100	100	100	100							10-20
7	fresh frozen	2,033,932	7.306	100	100	100	99.93							20-30
8	FFPE	1,524,173	5.337	100	100	100	99.92							50-60
9	fresh frozen	4,010,579	14.496	100	100	100	99.99							50
10	fresh frozen	1,933,324	6.943	100	100	100	99.83							40-50
11	fresh frozen	2,023,460	7.253	100	100	100	99.95	PIK3CA	5.53					60
12	FFPE	1,680,104	5.781	100	100	100	99.83							20-30
13	fresh frozen	2,096,907	7.381	100	100	100	99.37	CCND1	32.48					50-60
14	fresh frozen	1,678,848	6.01	100	100	100	99.75							3
15	FFPE	1,923,660	6.835	100	100	100	99.99			PIK3CA	c.1624G>A	p.E542K	39	80	pathogenic
16	FFPE	1,771,968	6.131	100	100	100	99.94	CCND1	19.71					60-70
17	fresh frozen	1,852,875	6.608	100	100	100	99.74							60
18	FFPE	3,706,430	13.07	100	100	100	100							70
19	FFPE	2,607,739	9.149	100	100	100	99.99			RAF1	c.770C>T	p.S257L	4	70-80	pathogenic
19										FGFR1	c.2360G>A	p.R787H	48		VUS
20	FFPE	1,905,436	6.69	100	100	100	99.99							70
21	FFPE	1,897,614	6.732	100	100	100	99.95	PIK3CA	5.29					50-60
22	FFPE	1,207,826	4.198	100	100	100	99.79			NRAS	c.38G>A	p.G13D	38	50	pathogenic
23	fresh frozen	1,976,337	7.052	100	100	100	99.77							10
24	fresh frozen	1,792,271	6.38	100	100	100	99.86							70
25	fresh frozen	2,348,966	8.43	100	100	100	99.95							30-40
26	fresh frozen	1,712,456	6.093	100	100	100	99.95			AKT	c.49G>A	p.E17K	26	70-80	pathogenic
26										MTOR	c.5383G>C	p.V1795L	30		VUS
27	fresh frozen	1,774,980	6.336	100	100	100	99.86							20
28	fresh frozen	1,937,041	6.931	100	100	100	99.96	EGFR	5.48					40-50
29	fresh frozen	1,727,143	6.139	100	100	100	99.82			HRAS	c.34G>A	p.G12S	52	90	pathogenic
30	fresh frozen	2,192,519	7.785	100	100	100	99.91							60-70
31	FFPE	5,433,856	18.918	100	100	100	100							70
7 (Recurrence)	FFPE	2,538,66	8.668	100	100	100	100							20-30
10 (Recurrence)	FFPE	1,679,661	5.938	100	100	100	99.86	CCND1	5.94					80
16 (Recurrence)	FFPE	2,867,867	10.128	100	100	100	99.99	CCND1	30.54					60-70
